# Supplementary material for: VN and SeS2 embedded porous carbon-nanofiber film as a free-standing electrode for improved Li–SeS2 batteries
Source: Royal Society of Chemistry journal article supplement (doi:10.1039/d2cc02218d), 2022-01-01
Supplement: d2cc02218d1.pdf [file d2cc02218d1.pdf]

**Electronic Supplementary Material (ESI) for ChemComm.**

**This journal is © The Royal Society of Chemistry 2022**

# **VN and SeS<sub>2</sub> Embedded Porous Carbon-Nanofiber Film as a Free-standing Electrode for Improved Li-SeS<sub>2</sub> Battery**

*Yu Shao<sup>1</sup>, Fei Chen<sup>1</sup>, Naiqing Ren<sup>1</sup>, Shuo Wang<sup>1</sup>, Junru Wang<sup>1</sup>, Zhaoyin Wen<sup>2</sup>, Chunhua Chen<sup>1</sup>. \**

<sup>1</sup>CAS Key Laboratory of Materials for Energy Conversions, Department of Materials Science and Engineering & Collaborative Innovation Center of Suzhou Nano Science and Technology, University of Science and Technology of China, Anhui Hefei 230026, China. E-mail: cchchen@ustc.edu.cn

<sup>2</sup>Key Laboratory of Energy Conversion Laboratory, Shanghai Institute of Ceramics, Chinese Academy of Sciences, Shanghai 200050, China

## **Experimental section**

### **Synthesis of VN/CNFs, CNFs, VN/CNFs-2 and VN/CNFs-3 hosts.**

All chemicals were analytical grade and used without further purification. Firstly, 9.1 g N,N-dimethylformamide (DMF, SCRC), 0.4 g vanadyl(IV) acetylacetonate, 0.15 g polystyrene (PS,  $M_w=280000$ ), and 0.85 g polyacrylonitrile (PAN,  $MW=150\ 000$ , Aldrich) were mixed and stirred for several hours. After that, the precursor solution was loaded into a 10 ml syringe with 18-gauge blunt tip for electrospinning. The feeding rate was  $15\ \mu\text{l}\ \text{min}^{-1}$ , the positive voltage was 19 kV and the distance between the syringe nozzle and the collector was 15 cm. The as-prepared nanofibers film was then stabilized at  $250\ ^\circ\text{C}$  for 2 h in air and subsequently annealed at  $700\ ^\circ\text{C}$  for 1 h in  $\text{NH}_3$  atmosphere to obtain the VN/CNFs. The CNFs was prepared with the same conditions except that no vanadyl(IV) acetylacetonate was added in the precursor solution. Moreover, we carried out the same synthesis process that used to prepare VN/CNFs sample except that reducing the amount of vanadyl(IV) acetylacetonate from 0.4 g to 0.1 g, and obtained the sample with a low VN content (VN/CNFs-2). Similarly, we prepared the sample with a high VN content (VN/CNFs-3) by increasing the amount of vanadyl(IV) acetylacetonate from 0.4 g to 0.7 g.

### **Synthesis of SeS<sub>2</sub>@VN/CNFs, SeS<sub>2</sub>@VN/CNFs-2, SeS<sub>2</sub>@VN/CNFs-3 and SeS<sub>2</sub>@CNFs cathode films.**

0.72 g commercial SeS<sub>2</sub> powder was firstly mixed with 0.28 g VN/CNFs. The mixture was then heated at 155 °C for 12 h in an Ar-filled autoclave. After cooling down to room temperature, SeS<sub>2</sub>@VN/CNFs was obtained. Similarly, SeS<sub>2</sub>@VN/CNFs-2, SeS<sub>2</sub>@VN/CNFs-3 and SeS<sub>2</sub>@CNFs were prepared with the same process.

### **Material Characterization**

The microstructure morphology of these samples was investigated by field-emission scanning electron microscopy (FESEM, JEOL, Tokyo, Japan), transmission electron microscopy (TEM, JEOL, Tokyo, Japan) and high-resolution TEM (HRTEM). X-ray powder diffraction (XRD) (Philips X'Pert PRO SUPER X-ray diffractometer with Cu-K $\alpha$  radiation) and XPS measurement was used to characterize surface chemistry of the samples. The EDX mapping was performed on a Hitachi S-4800 scanning electron microscope equipped with an energy dispersive X-ray analyzer (Horiba EMAX).

### **Electrochemical Investigation**

The SeS<sub>2</sub>@VN/CNFs and SeS<sub>2</sub>@CNFs films were directly used as the cathode and metallic Li sheet was used as counter and reference electrode to make 2032-type coin cells in an argon-filled glove box. The Celgard 2400 membrane was used as a separator. The average mass loading of SeS<sub>2</sub> in cathode films was around 1 mg cm<sup>-2</sup>. The electrolyte was composed of 1 M lithium bis(trifluoromethanesulfonyl)imide (LiTFSI) in a solvent mixture of 1,3-dioxolane (DOL) and dimethoxymethane (DME) (1:1 in volume) with 1 wt.% LiNO<sub>3</sub> as an additive. The electrolyte/SeS<sub>2</sub> ratio was around 35  $\mu$ L mg<sup>-1</sup> for Li-SeS<sub>2</sub> batteries. The galvanostatic charge-discharge measurements were performed on Neware BTS-610 instrument at a voltage window of 1.6-2.8V. The cyclic voltammetry tests and electrochemical impedance spectrum

tests are carried out on CHI 660D workstation.

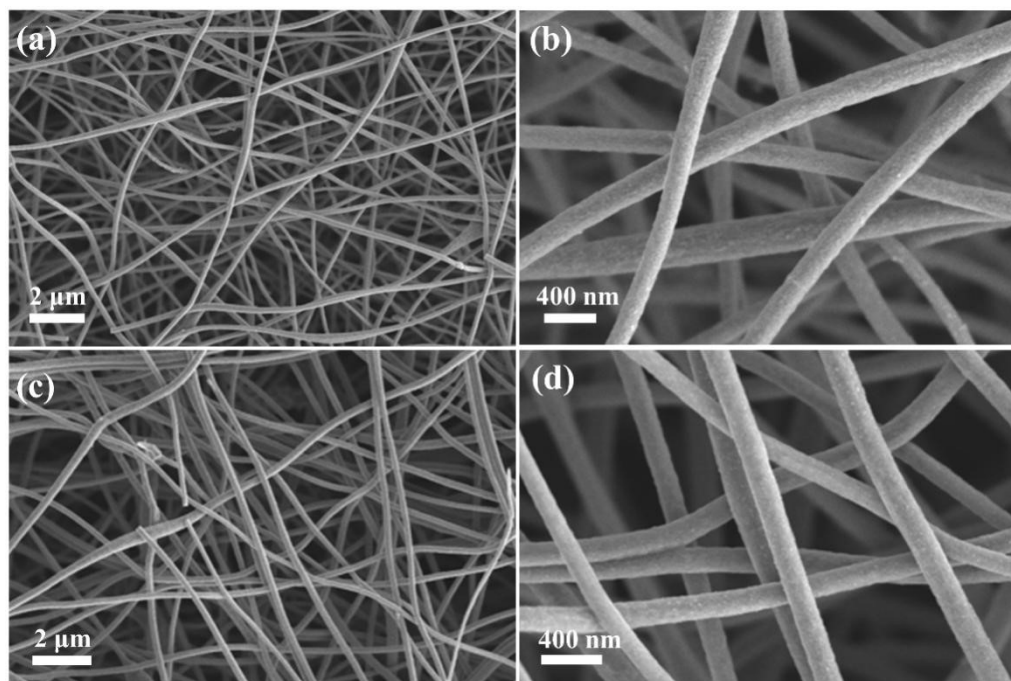

**Fig. S1** SEM images of (a and b) VN/CNFs, (c and d) SeS<sub>2</sub>@VN/CNFs.

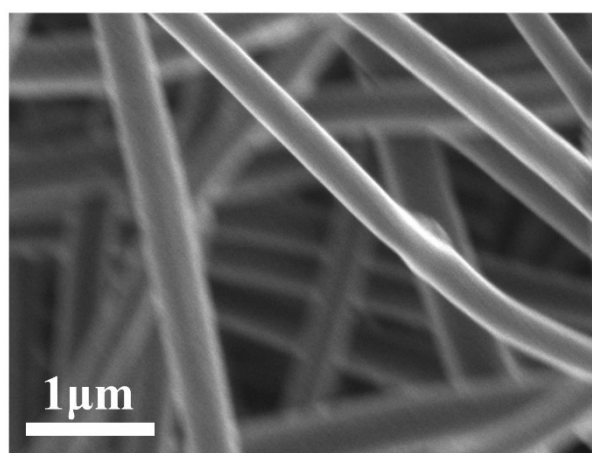

**Fig. S2** SEM image of the CNFs.

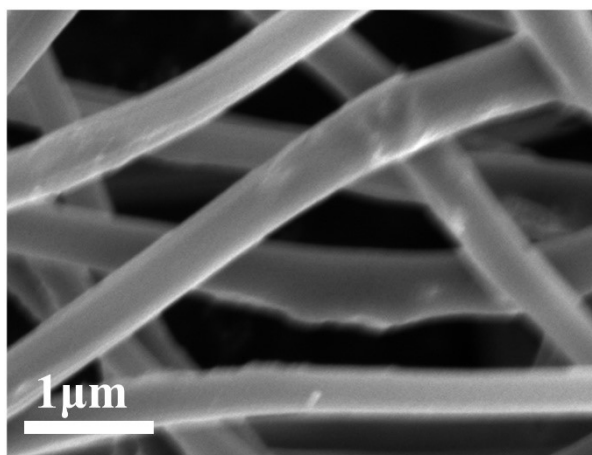

**Fig. S3** SEM image of the  $\text{SeS}_2@\text{CNFs}$

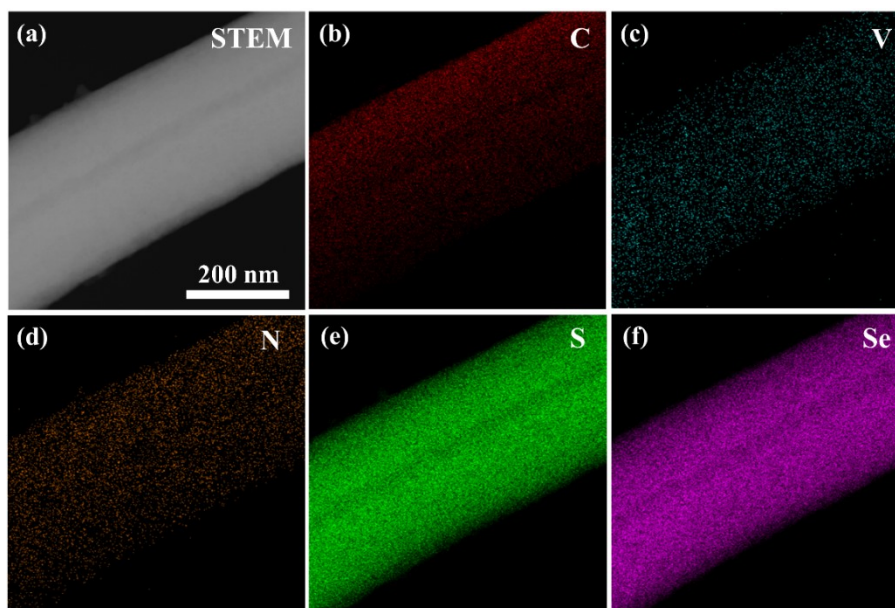

**Fig. S4** TEM elemental mapping images of  $\text{SeS}_2@\text{VN/CNFs}$ .

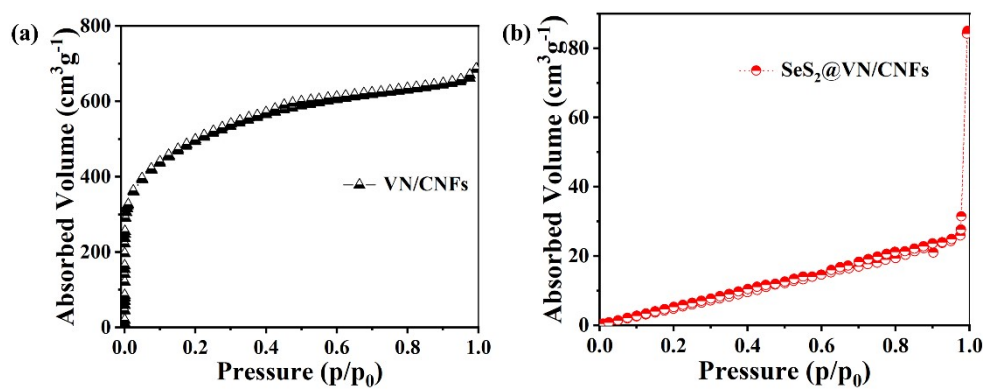

Fig S5. Nitrogen adsorption/desorption isotherm of VN/CNFs and SeS<sub>2</sub>@VN/CNFs.

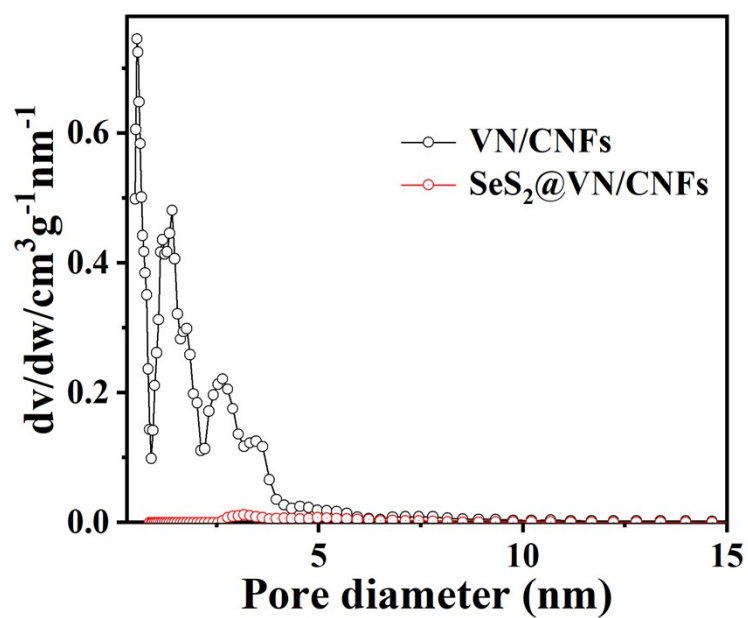

Fig. S6 Pore size distribution of VN/CNFs and SeS<sub>2</sub>@VN/CNFs.

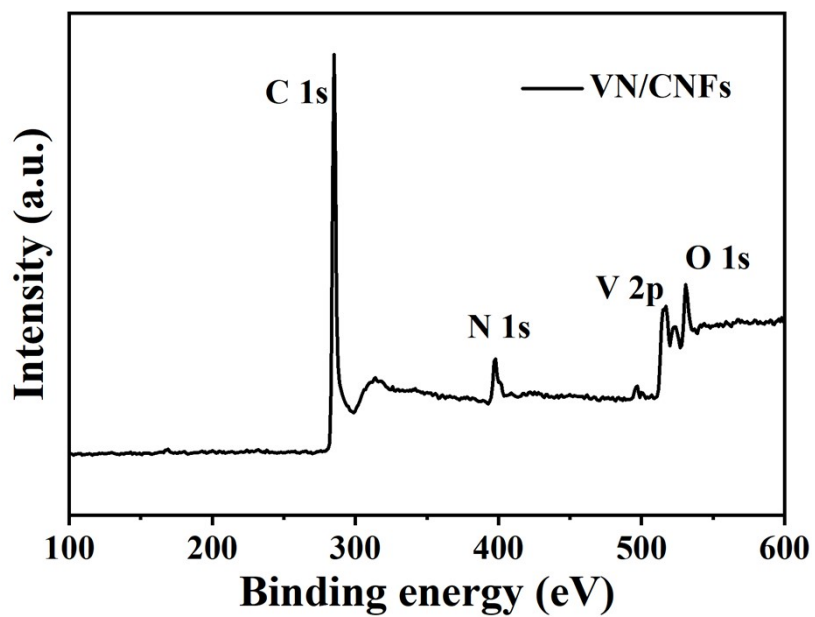

Fig. S7 XPS survey spectrum of VN/CNFs.

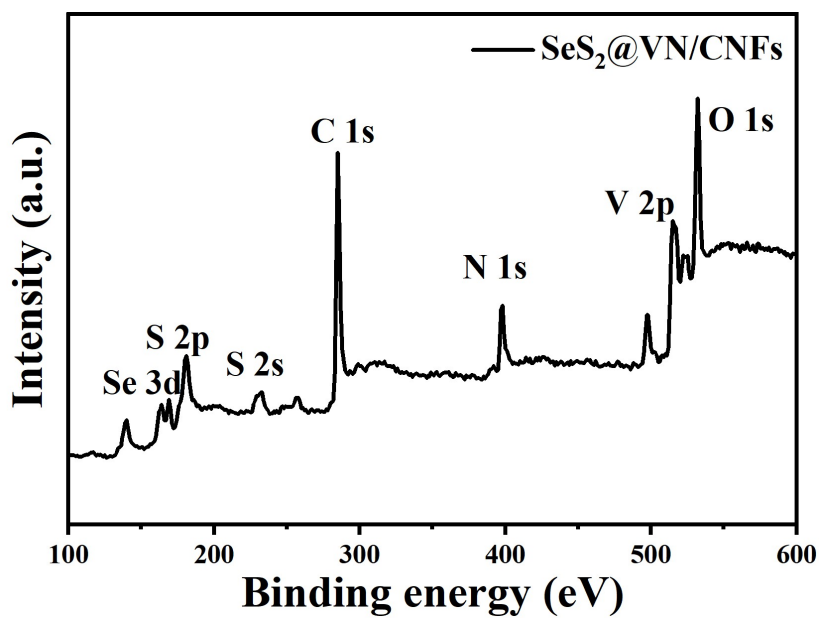

Fig. S8 XPS survey spectrum of SeS<sub>2</sub>@VN/CNFs.

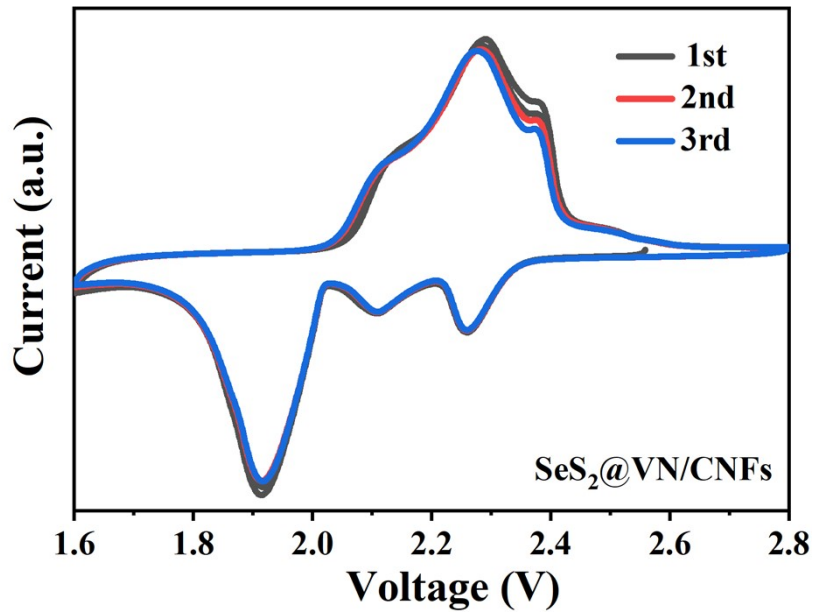

Fig. S9 The CV curves of the SeS<sub>2</sub>@VN/CNFs.

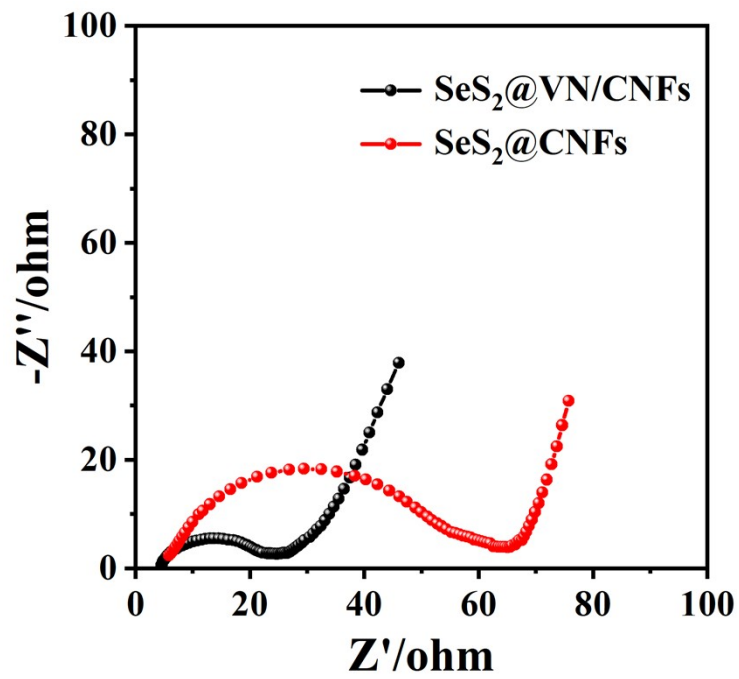



**Fig. S10** Nyquist plots for Li-SeS<sub>2</sub>@VN/CNFs and Li-SeS<sub>2</sub>@CNFs cells after three cycles at 0.2 C.

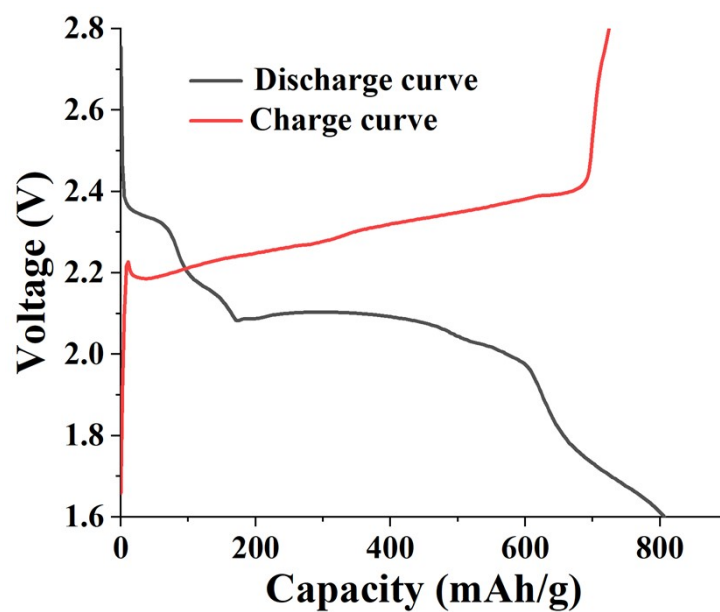

**Fig. S11** The first-cycle charge-discharge curve of SeS<sub>2</sub>@VN/CNFs.

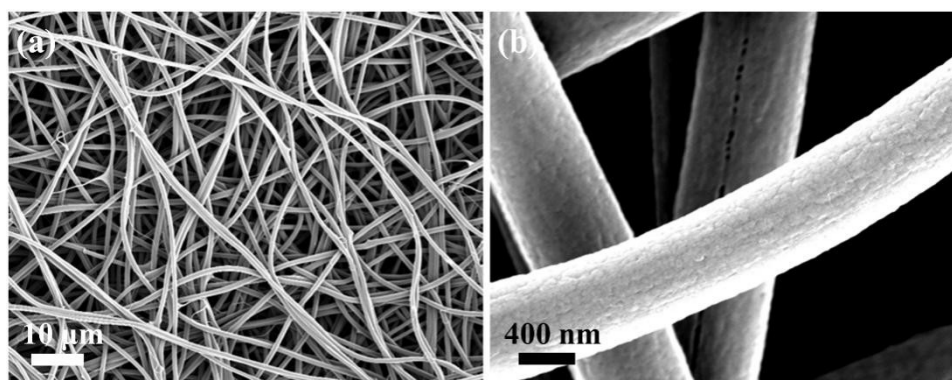

**Fig. S12** SEM images of VN/CNFs-2.

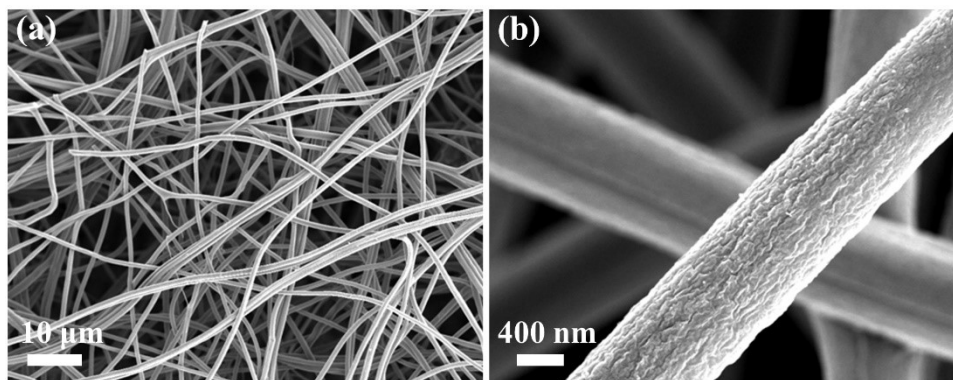

**Fig. S13** SEM images of VN/CNFs-3.

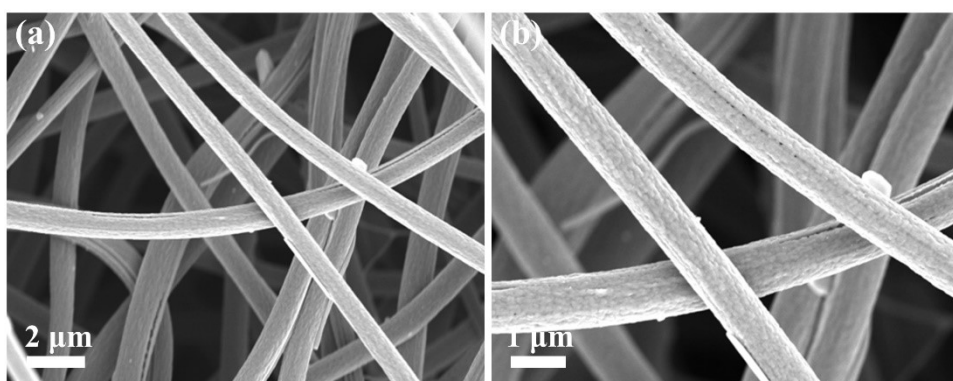

**Fig. S14** SEM images of SeS<sub>2</sub>@VN/CNFs-2.

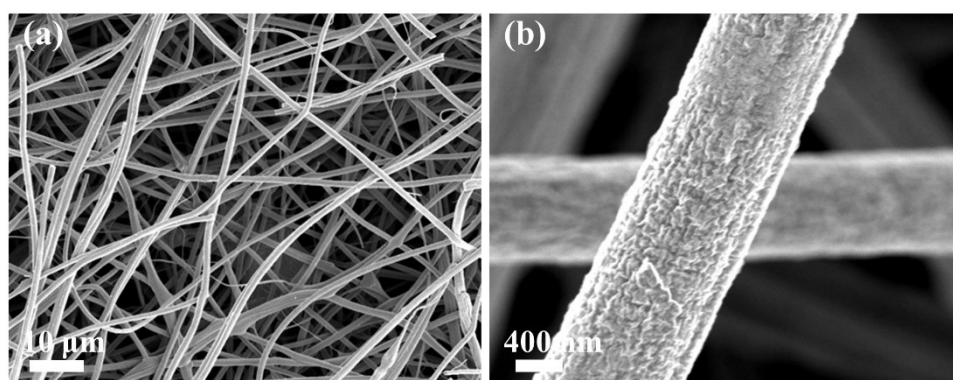

**Fig. S15** SEM images of SeS<sub>2</sub>@VN/CNFs-3.

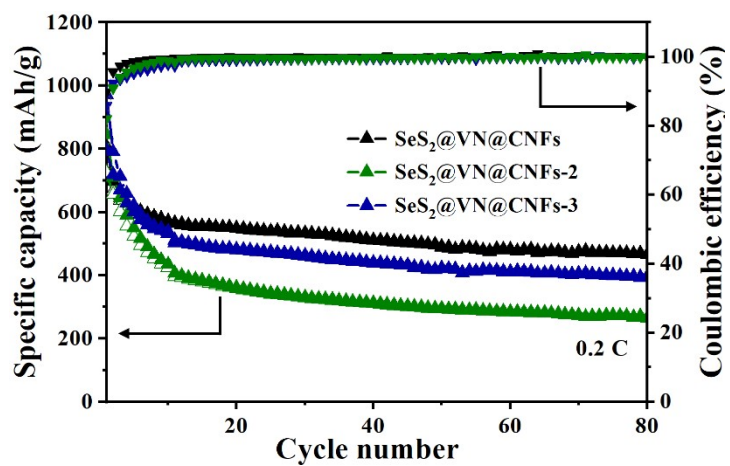

**Fig. S16** Cycle performance comparisons of SeS<sub>2</sub>@VN/CNFs, SeS<sub>2</sub>@VN/CNFs-2 and SeS<sub>2</sub>@VN/CNFs-3 at 0.2 C.

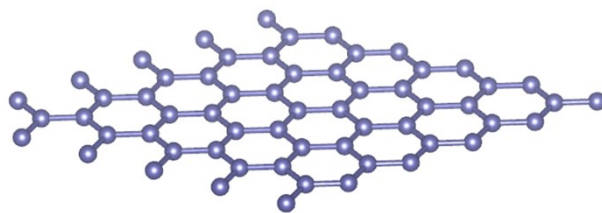

**Fig. S17** The model structure of graphite for DFT calculations.
